# Supplementary material for: Aberrantly reduced expression of miR-342-5p contributes to CCND1-associated chronic myeloid leukemia progression and imatinib resistance
Source: PubMed Central journal article supplement (PMC8492784; doi:10.1038/s41419-021-04209-2), 2021-10-05
Supplement: 41419_2021_4209_MOESM1_ESM.pdf [file 41419_2021_4209_MOESM1_ESM.pdf]

| Characteristics   | Patient Number (n = 20) |
|-------------------|-------------------------|
| Age (years)       | 51.65 (20-88)           |
| Gender            |                         |
| Male              | 12                      |
| Female            | 8                       |
| Splenomegaly (cm) | 15.11 (8-21.6)          |
| PB Blast (%)      | 2.04 (0-11)             |
| BM Blast (%)      | 3.34 (0.5-5.03)         |
| Eosinophil (%)    | 3.42 (0-18.4)           |
| Basophil (%)      | 3.04 (0-13)             |
| WBC count         |                         |
| $\leq 100,000$    | 7                       |
| $> 100,000$       | 13                      |
| Platelet count    |                         |
| $\leq 450,000$    | 13                      |
| $> 450,000$       | 7                       |
