# Supplementary material for: Aberrantly reduced expression of miR-342-5p contributes to CCND1-associated chronic myeloid leukemia progression and imatinib resistance
Source: PubMed Central journal article supplement (PMC8492784; doi:10.1038/s41419-021-04209-2), 2021-10-05
Supplement: 41419_2021_4209_MOESM2_ESM.pdf [file 41419_2021_4209_MOESM2_ESM.pdf]

A

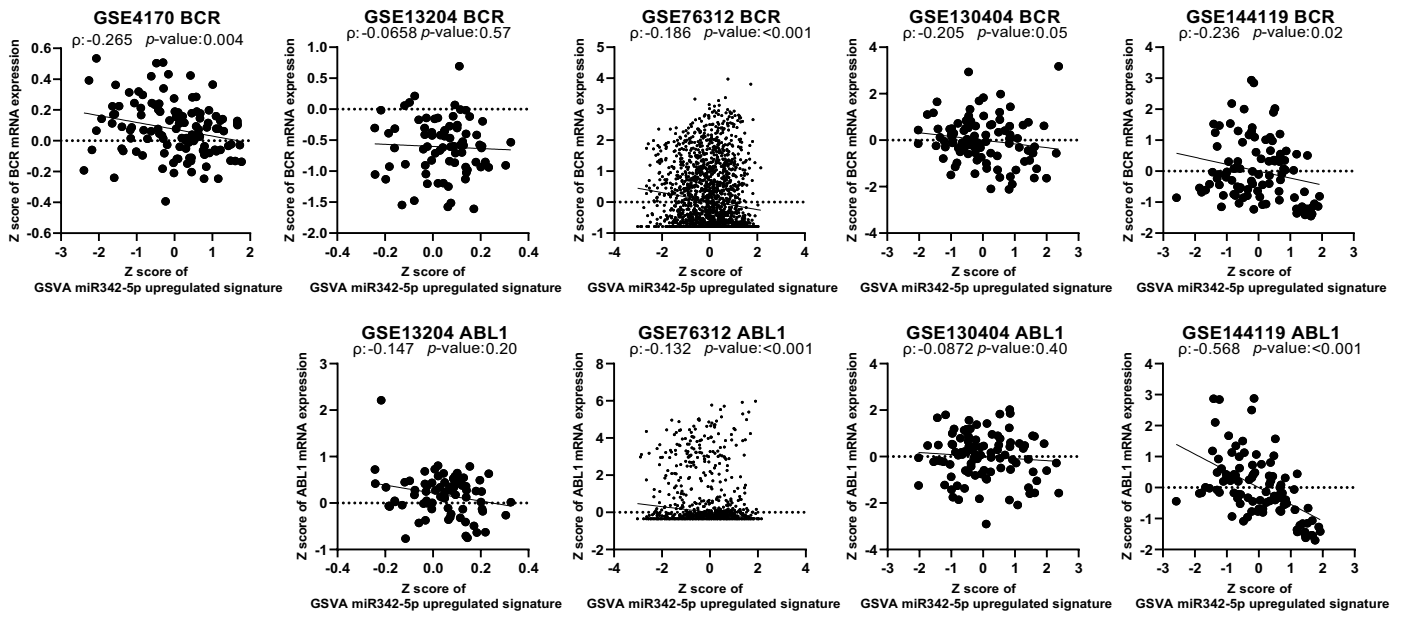

B

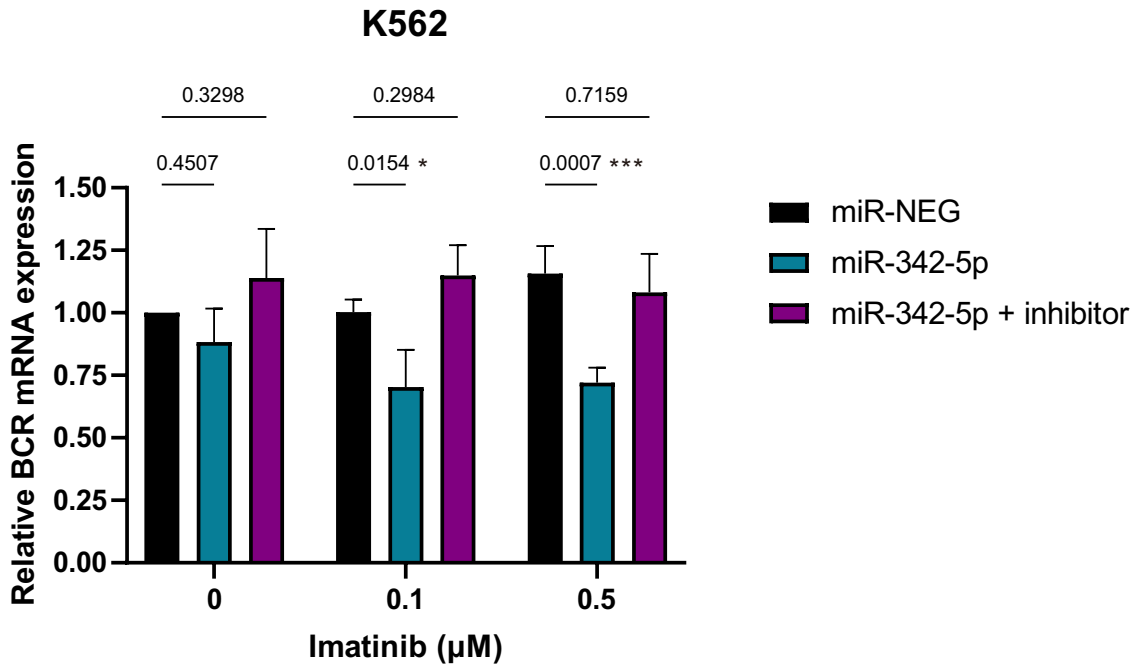

**Supplementary Figure Evaluating the relationship between miR-342-5p overexpression and BCR mRNA expression.** (A) Correlation between GSVAscore of miR-342-5p upregulated gene signature and normalized mRNA expression of BCR and ABL1 in clinical databases. The correlation was evaluated using Spearman correlation. (B) Bar chart presenting the impact of miR-342-5p overexpression on BCR mRNA level analyzed by qPCR. One-way ANOVA was used to assess the significance of statistical differences.
